# Supplementary material for: Process development and policy implications for large scale deployment of solar-driven electrolysis-based renewable methanol production
Source: Royal Society of Chemistry journal article supplement (doi:10.1039/d2gc01993k), 2022-01-01
Supplement: d2gc01993k1.pdf [file d2gc01993k1.pdf]

## **Process development and policy implications for large scale deployment of solar-driven electrolysis-based renewable methanol production**

Abiha Abbas<sup>a,1</sup>, Kinza Qadeer<sup>b,1</sup>, Amer Al-Hinai<sup>c\*\*\*</sup>, Muhammad Hazim Tarar<sup>a</sup>, Muhammad Abdul Qyyum<sup>d</sup>, Ala'a H. Al-Muhtaseb<sup>d</sup>, Rashid Al Abri<sup>c</sup>, Moonyong Lee<sup>b\*\*</sup>, Rofice Dickson<sup>a\*</sup>

<sup>a</sup>*Department of Chemistry & Chemical Engineering, SBA School of Science and Engineering, Lahore University of Management Sciences (LUMS), Lahore, 54792, Pakistan*

<sup>b</sup>*School of Chemical Engineering, Yeungnam University, Gyeongsan 712-749, South Korea*

<sup>c</sup>*Sustainable Energy Research Center (SERC) and Department of Electrical and Computer Engineering, College of Engineering, Sultan Qaboos University, Muscat, Oman*

<sup>d</sup>*Department of Petroleum and Chemical Engineering, College of Engineering, Sultan Qaboos University, Muscat, Oman*

<sup>1</sup> These authors contributed equally.

\*, \*\*, \*\*\*The three authors have the same contribution to this study.

### **Corresponding authors**

[hinai@squ.edu.om](mailto:hinai@squ.edu.om) (A. A. Hinai); [myonlee@yu.ac.kr](mailto:myonlee@yu.ac.kr) (M. Lee); [roface.dickson@lums.edu.pk](mailto:roface.dickson@lums.edu.pk) (R. Dickson)

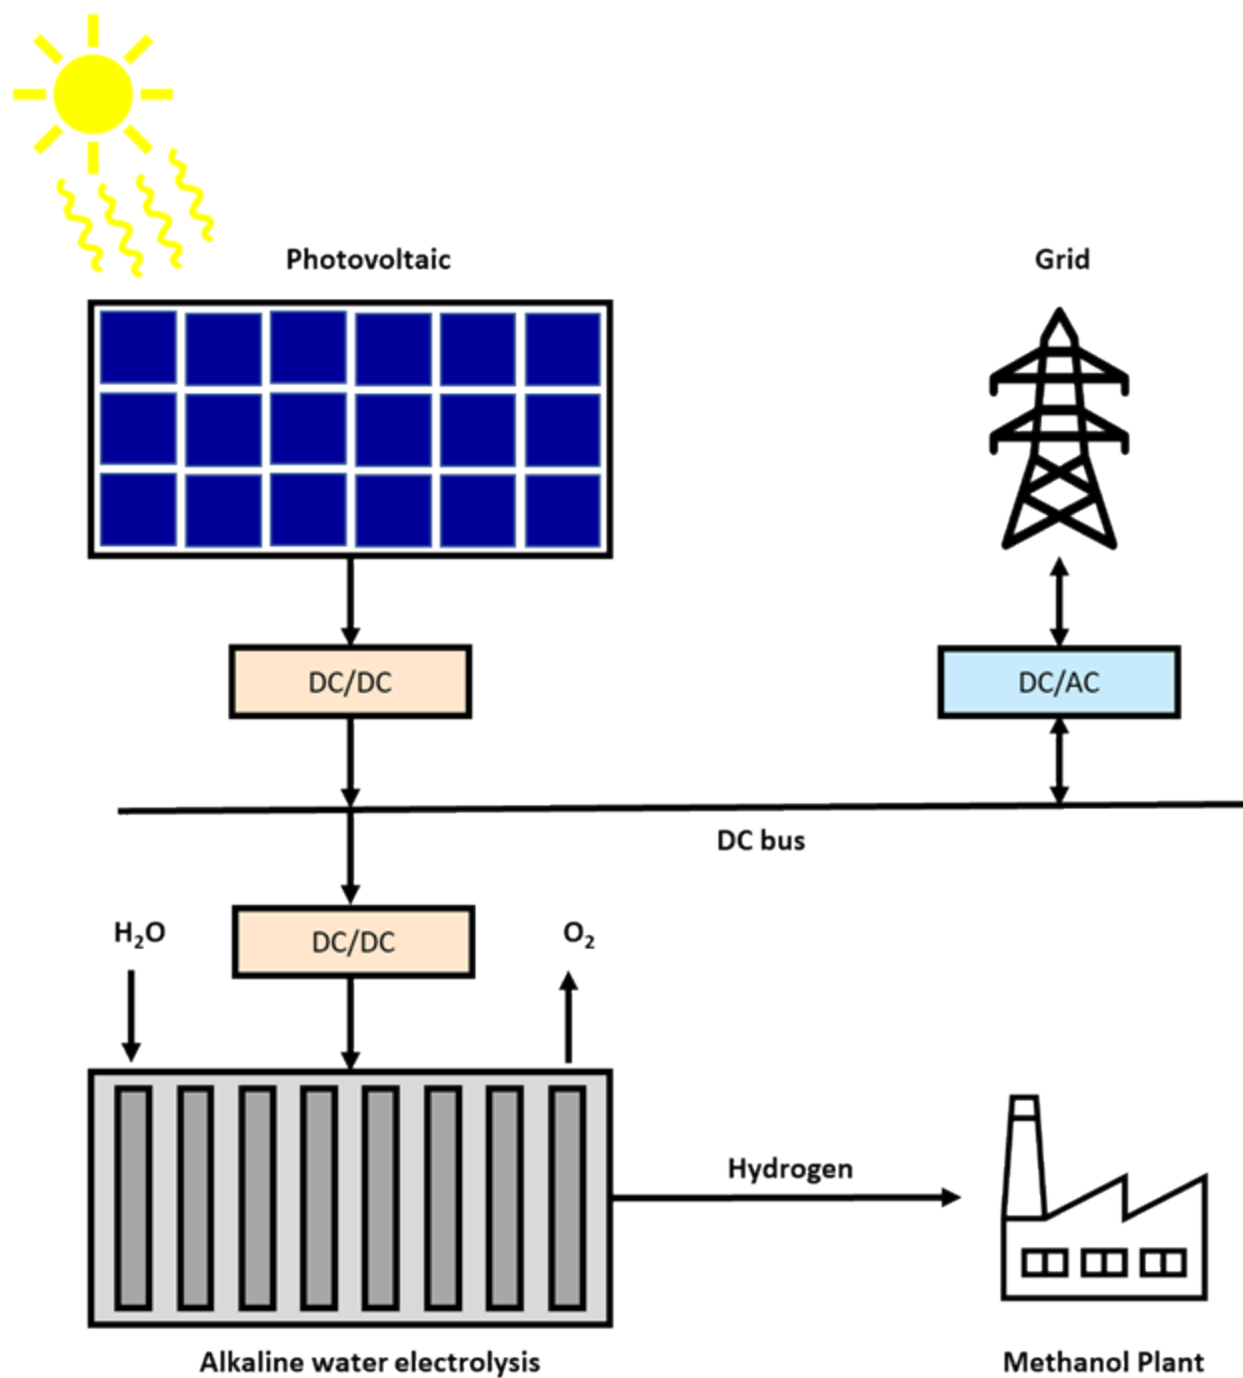

**Figure S1** Methodology for determining the minimum production cost of renewable hydrogen produced via solar driven electrolyzer.



## Mathematical model to determine minimum production cost of renewable hydrogen

The power ( $P_{t,m}$ ) produced by the solar plant at time  $t$  in month  $m$  is calculated as follows:

$$P_{t,m} = \theta_{t,m} \times C, \quad \forall t \in T, \forall m \in M, \quad (1)$$

where  $\theta_{t,m}$  is specific power (kWh/kWp) at time  $t$  in month  $m$  and  $C$  is the capacity of the solar plant.

Once renewable power is produced, it can be processed in two ways as follows:

$$P_{t,m} = P1_{t,m} + P2_{t,m} \quad \forall t \in T, \forall m \in M, \quad (2)$$

where  $P1_{t,m}$  is the power utilized by electrolyzer at time  $t$  in month  $m$ . Whereas  $P2_{t,m}$  is the power not utilized by electrolyzer at time  $t$  in month  $m$ . The  $P2_{t,m}$  is the case when the available power either exceeds the electrolyzer capacity or is below the operating capacity of the electrolyzer.

The  $P2_{t,m}$  can be exported to the grid ( $G$ ) as follows:

$$G \leq \sum_{t,m} P2_{t,m} \quad (3)$$

When solar power is not available, the power exported to the grid ( $G$ ) can be imported ( $PI_{t,m}$ ) at time  $t$  in month  $m$  as follows:

$$\sum_{t,m} PI_{t,m} \leq G \quad (4)$$

The power to the electrolyzer cannot exceed its capacity ( $\delta$ ) and cannot be below the minimum required power ( $\alpha$ ). To ensure this, logical constraints are modeled as:

$$P1_{t,m} + S_{t,m} \leq \delta, \quad \forall t \in T, \forall m \in M, \quad (5)$$

$$P1_{t,m} + S_{t,m} \leq Z_{t,m} \times \zeta, \quad \forall t \in T, \forall m \in M, \quad (6)$$

$$P1_{t,m} + S_{t,m} \geq \alpha \times \delta - \zeta \times (1 - Z_{t,m}), \quad \forall t \in T, \forall m \in M, \quad (7)$$

where  $Z_{t,m}$  represent binary variables to allow power to the electrolyzer at time  $t$  in month  $m$  and  $\zeta$  represents the upper bound for power to the electrolyzer according to the Big-M formulation method.

The hydrogen ( $H_{t,m}$ ) produced by the electrolyzer at time  $t$  in month  $m$  is estimated as follows:

$$H_{t,m} = \eta \times (P1_{t,m} + S_{t,m}), \quad \forall t \in T, \forall m \in M, \quad (8)$$

where  $\eta$  is the electrolyzer efficiency and  $S_{t,m}$  is renewable power imported from the grid at time  $t$  in month  $m$ .

The total annual hydrogen ( $TH$ ) produced is estimated as follows:

$$TH = \sum_{t,m} H_{t,m} \times d_m \quad (9)$$

where  $d_m$  is days in month  $m$ .

The total annual operating hours of the electrolyzer ( $TE$ ) are estimated as follows:

$$TE = \sum_{t,m} Z_{t,m} \times d_m \quad (10)$$

Finally, economic analysis was performed by formulating a discounted cash flow rate of return analysis model based on CAPEX (capital expenditure) and OPEX (Operating expenditure). The Levelized cost of hydrogen (LCOH) was selected as an economic indicator for evaluating hydrogen cost (\$/kg) and defined as follows:

$$LCOH = \frac{NPV \text{ of total costs}}{NPV \text{ of hydrogen production}}, \quad (11)$$

where NPV is the net present value. The NPV of total costs is estimated as follows:

$$NPV \text{ of total costs} = \sum_n \frac{CAPEX + OPEX}{(1 + IRR)^n}, \quad (12)$$

where IRR is the internal rate of return. The CAPEX and OPEX are estimated based on the below parameters.

**Table S2** Parameters used in optimization to estimate the Levelized cost of hydrogen.

| <b>Items</b>                                        | <b>Value</b>              |
|-----------------------------------------------------|---------------------------|
| PV CAPEX (\$/kWh)                                   | 1200                      |
| PV OPEX (\$/kWh)                                    | 14.4                      |
| IRR                                                 | 0.06                      |
| Electrolyzer CAPEX (\$/kW)                          | 1150                      |
| Water (L/kg of H <sub>2</sub> )                     | 10                        |
| Stack replacement (hours)                           | 40000                     |
| Stack replacement cost                              | 0.4 of electrolyzer CAPEX |
| Electrolyzer OPEX (\$/kW)                           | 17                        |
| Minimum operating capacity of the electrolyzer(kW)  | 100                       |
| Maximum operating capacity of the electrolyzer (kW) | 1000                      |

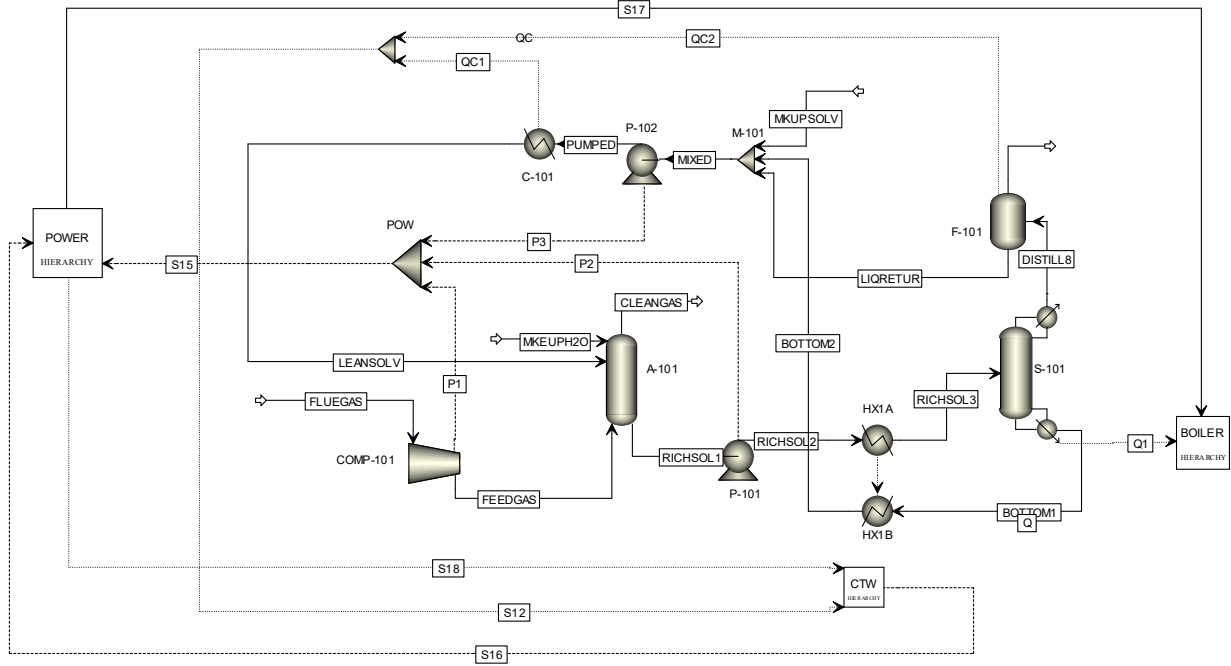

Figure S2 Aspen plus model of carbon dioxide capture plant.

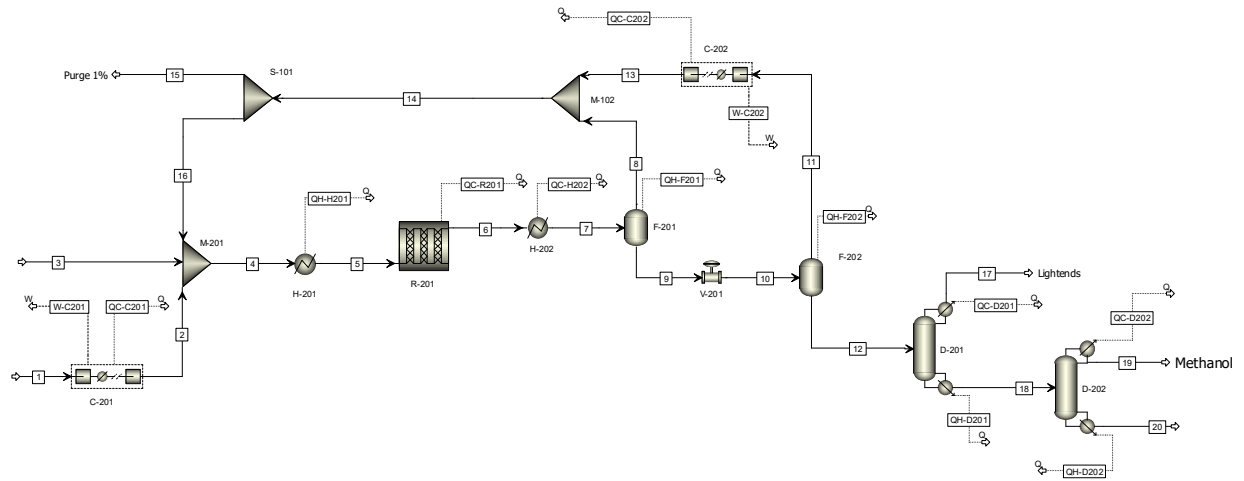

Figure S3 Aspen plus model of base case design.

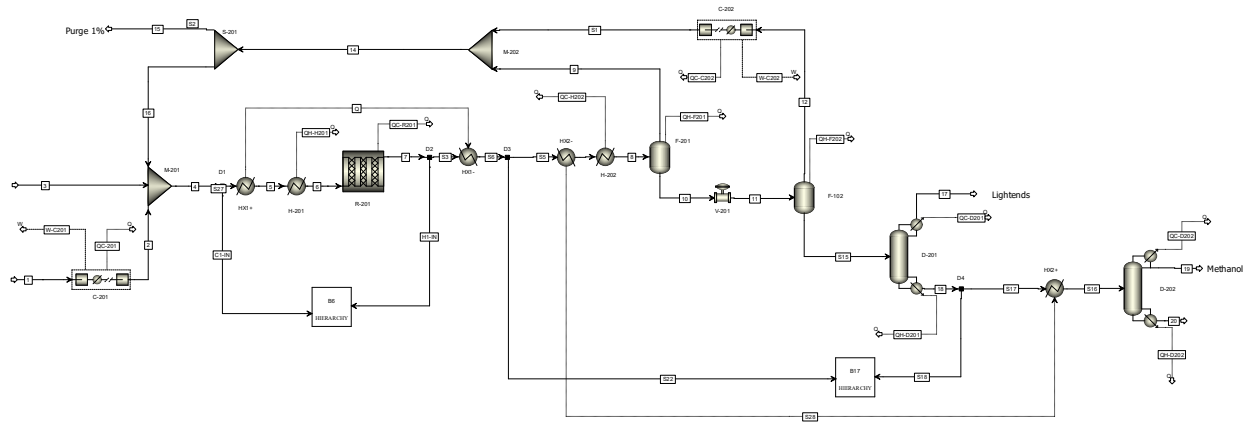

Figure S4 Aspen plus model of integrated design.

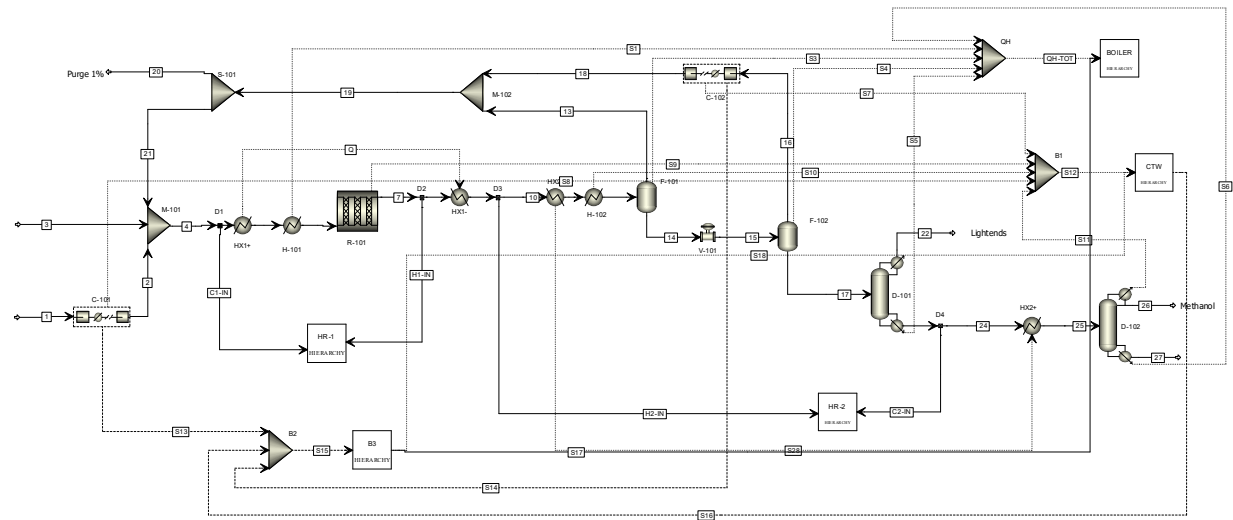

Figure S5 Aspen plus model of 100% renewable design.

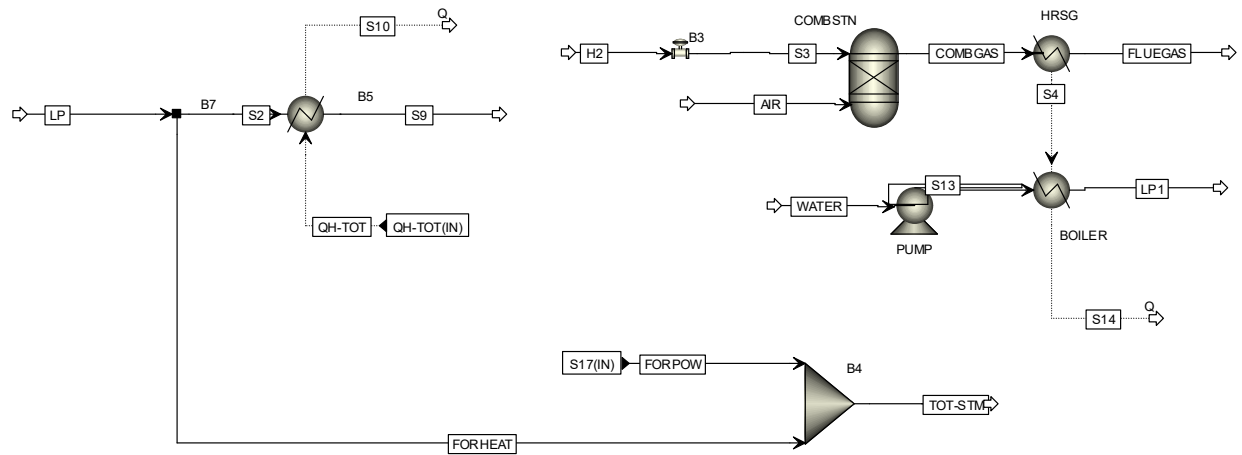

Figure S6 Aspen plus model of boiler design for carbon capture and 100% renewable methanol plants.

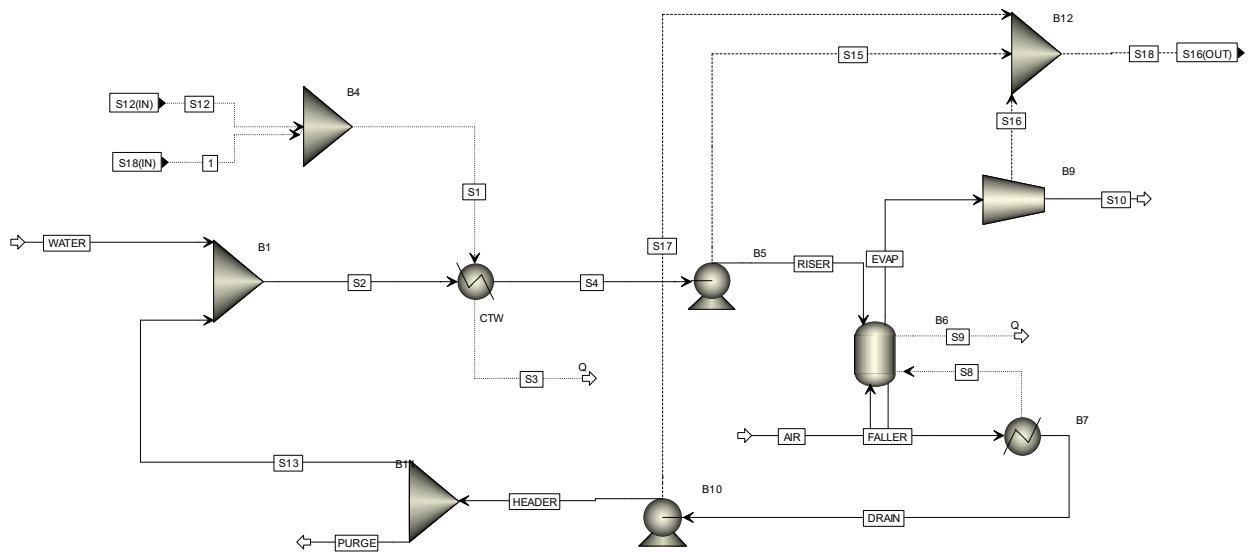

Figure S7 Aspen plus model of cooling tower design for carbon capture and 100% renewable methanol plants.



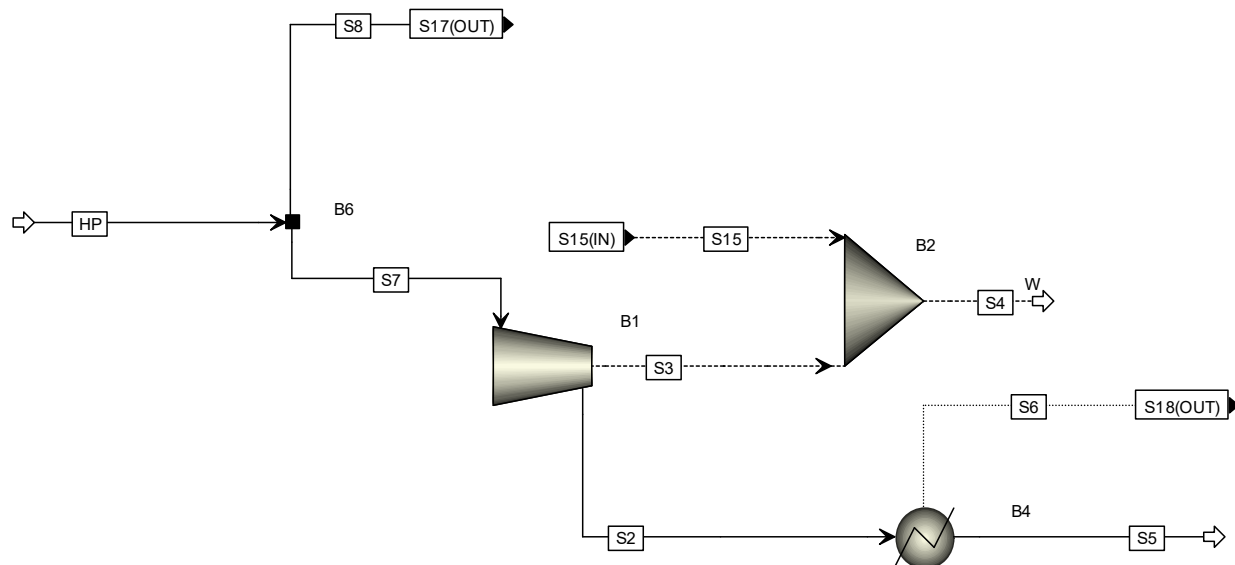

**Figure S8** Aspen plus model of power generation for carbon capture and 100% renewable methanol plants.

**Table S3** Deterministic price of chemicals and utility.

| Chemicals               | Price                                             |
|-------------------------|---------------------------------------------------|
| Hydrogen (\$/kg)        | 4 \$/kg (Calculated value, see Section 3.1 of MS) |
| MEA (\$/kg)             | 1.31 \$/kg [1]                                    |
| Heating utility (\$/GJ) | 4.03 USD/GJ [2]                                   |
| Electricity (\$/GJ)     | 0.65 USD/GJ [3]                                   |
| Chilled water           | 5 USD/GJ [4]                                      |
| Wastewater              | 0.041 USD/m <sup>3</sup> [4]                      |

**Table S4** Uncertainties chemical prices, utilities, economic indicators, and total capital investment [5,6].

| Chemicals        | Price           |
|------------------|-----------------|
| Hydrogen (\$/kg) | 1–6 \$/kg       |
| MEA (\$/kg)      | 0.98–1.64 \$/kg |
| IRR              | 6–14%           |
| TCI              | ±50%            |
| Utilities        | ±25%            |

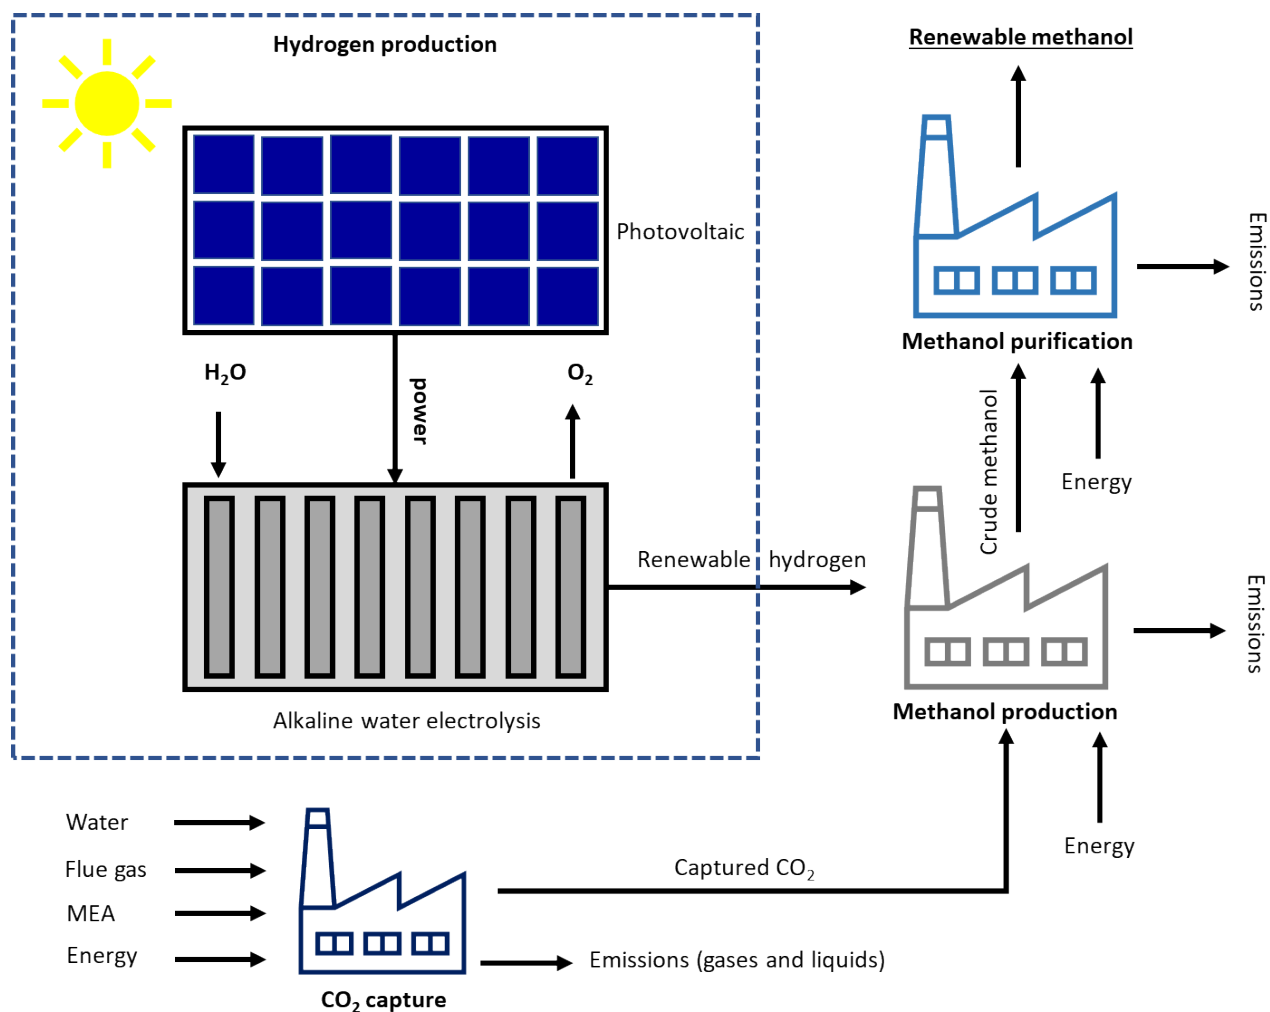

**Figure S9** System boundary for gate-to-gate life cycle assessment of methanol production.

**Table S5** Material required to produce 1 kg hydrogen from solar-driven electrolysis.

| <b>Electrolyzer operation</b>              | <b>Value</b> |
|--------------------------------------------|--------------|
| Electricity (kWh/kg H <sub>2</sub> )       | 50.000       |
| Water (kg/kg H <sub>2</sub> )              | 10.000       |
| Nitrogen (g/kg H <sub>2</sub> )            | 0.290        |
| Potassium hydroxide (g/kg H <sub>2</sub> ) | 1.900        |
| Steam (kg/kg H <sub>2</sub> )              | 0.110        |

**Table S6** Inventory data for methanol production. Data is scaled based on one kg methanol.

| <b>Item</b>                   | <b>Fossil-based Methanol</b> | <b>Base design</b> | <b>Integrated design</b> | <b>100% renewable design</b> |
|-------------------------------|------------------------------|--------------------|--------------------------|------------------------------|
| <b>Electrolyzer operation</b> |                              |                    |                          |                              |
| Renewable electricity         | 0.00E+00                     | 9.83E+00           | 9.83E+00                 | 1.28E+01                     |
| Water                         | 0.00E+00                     | 1.97E+00           | 1.97E+00                 | 2.56E+00                     |
| Nitrogen                      | 0.00E+00                     | 5.70E-02           | 5.70E-02                 | 7.43E-02                     |
| Potassium hydroxide           | 0.00E+00                     | 3.73E-03           | 3.73E-03                 | 4.87E-03                     |
| Steam                         | 0.00E+00                     | 2.16E-02           | 2.16E-02                 | 2.82E-02                     |
| <b>CO<sub>2</sub> capture</b> |                              |                    |                          |                              |
| Water (kg)                    | 0.00E+00                     | 5.51E-02           | 5.51E-02                 | 5.51E-02                     |
| MEA in flue gas (kg)          | 0.00E+00                     | 3.05E-05           | 3.05E-05                 | 3.05E-05                     |
| MEA (kg)                      | 0.00E+00                     | 1.33E-04           | 1.33E-04                 | 1.33E-04                     |
| Grid electricity (kWh)        | 0.00E+00                     | 2.52E-02           | 2.52E-02                 | 0.00E+00                     |
| Heating, LP-steam (kWh)       | 0.00E+00                     | 5.36E+00           | 5.36E+00                 | 0.00E+00                     |
| <b>Methanol production</b>    |                              |                    |                          |                              |
| Renewable hydrogen (kg)       | 0.00E+00                     | 1.97E-01           | 1.97E-01                 | 2.56E-01                     |
| Fossil-derived hydrogen (kg)  | 1.97E-01                     | 0.00E+00           | 0.00E+00                 | 0.00E+00                     |
| CO <sub>2</sub> (kg)          | 1.44E+00                     | 1.44E+00           | 1.44E+00                 | 1.44E+00                     |
| Purge (kg)                    | 0.00E+00                     | 0.00E+00           | 0.00E+00                 | 0.00E+00                     |
| CO                            | 3.08E-03                     | 2.87E-03           | 3.08E-03                 | 3.08E-03                     |
| H <sub>2</sub>                | 6.03E-03                     | 5.64E-03           | 6.03E-03                 | 6.03E-03                     |
| Methanol                      | 4.58E-04                     | 4.41E-04           | 4.58E-04                 | 4.58E-04                     |
| CO <sub>2</sub>               | 4.38E-02                     | 4.10E-02           | 4.38E-02                 | 4.38E-02                     |
| H <sub>2</sub> O              | 5.23E-05                     | 5.03E-05           | 5.23E-05                 | 5.23E-05                     |
| Grid electricity (kWh)        | 1.57E-01                     | 1.65E-01           | 1.57E-01                 | 0.00E+00                     |
| Heating, LP-steam (kWh)       | 5.07E-02                     | 1.18E+00           | 5.07E-02                 | 0.00E+00                     |
| <b>Methanol purification</b>  |                              |                    |                          |                              |
| Light gases (kg)              |                              |                    |                          |                              |
| CO                            | 1.55E-06                     | 1.56E-06           | 1.55E-06                 | 1.55E-06                     |
| H <sub>2</sub>                | 1.56E-06                     | 1.59E-06           | 1.56E-06                 | 1.56E-06                     |
| Methanol                      | 8.06E-10                     | 1.74E-07           | 8.06E-10                 | 8.06E-10                     |
| CO <sub>2</sub>               | 6.85E-03                     | 6.88E-03           | 6.85E-03                 | 6.85E-03                     |
| Wastewater (kg)               |                              |                    |                          |                              |
| Methanol                      | 5.00E-03                     | 5.03E-03           | 5.00E-03                 | 5.00E-03                     |
| Grid electricity (kWh)        | 5.45E-03                     | 1.89E-03           | 5.45E-03                 | 0.00E+00                     |
| Heating, LP-steam (kWh)       | 6.75E-01                     | 9.74E-01           | 6.75E-01                 | 0.00E+00                     |

**Table S7** Ecoinvent 3.6 and ELCD databases selected for life cycle impact assessment of methanol production process.

| <b>Processes</b>                                                                                  | <b>Databases</b> |
|---------------------------------------------------------------------------------------------------|------------------|
| Electricity, high voltage {RoW}  electricity production, solar tower power plant, 20 MW   APOS, U | Ecoinvent 3.6    |
| De-ionised water, reverse osmosis, production mix, at plant, from surface water RER S             | ELCD             |
| Nitrogen, via cryogenic air separation, production mix, at plant, gaseous EU-27 S                 | ELCD             |
| Potassium hydroxide {RER}  production   APOS, S                                                   | Ecoinvent 3.6    |
| Water, Tap water {GLO}  market group for   APOS, S                                                | Ecoinvent 3.6    |
| Monoethanolamine {RER}  ethanolamine production   APOS, S                                         | Ecoinvent 3.6    |
| Hydrogen, gaseous {RoW}  hydrogen production, gaseous, petroleum refinery operation   APOS, S     | Ecoinvent 3.6    |
| Carbon dioxide, liquid {RoW}  production   APOS, S                                                | Ecoinvent 3.6    |
| Electricity, medium voltage {US}  market group for   APOS, S                                      | Ecoinvent 3.6    |
| Steam, in chemical industry {RoW}  market for steam, in chemical industry   APOS, S               | Ecoinvent 3.6    |

**Table S8** Life cycle indicator results of methanol production via different scenarios. Negative sign represents environmental savings while positive represent environmental burden. Environmental savings are obtained by substituting equivalent amount of fossil fuel-based hydrogen and carbon dioxide.

| <b>Impact categories</b> | <b>Fossil-based methanol</b> | <b>Base design</b> | <b>Integrated design</b> | <b>100% renewable design</b> |
|--------------------------|------------------------------|--------------------|--------------------------|------------------------------|
| ADP (kg Sb eq.)          | 1.83E-05                     | -1.34E-05          | -1.35E-05                | -1.31E-05                    |
| AFFDP (MJ)               | 4.13E+01                     | 1.54E+00           | -4.47E+00                | -3.74E+01                    |
| GWP100 (kg CO2 eq.)      | 1.91E+00                     | 1.57E+00           | 1.10E+00                 | -9.65E-01                    |
| ODP (kg CFC-11 eq.)      | 4.19E-07                     | -1.73E-07          | -2.08E-07                | -4.60E-07                    |
| HTP (kg 1,4-DB eq.)      | 2.37E+00                     | -1.32E+00          | -1.41E+00                | -1.77E+00                    |
| FWAETP (kg 1,4-DB eq.)   | 7.18E-01                     | 1.18E-01           | 5.78E-02                 | -1.30E-01                    |
| MAETP (kg 1,4-DB eq.)    | 1.72E+03                     | 4.40E+02           | 1.93E+02                 | -8.78E+02                    |
| TEP (kg 1,4-DB eq.)      | 2.57E-03                     | 7.03E-04           | 3.86E-04                 | -1.03E-03                    |
| PCOP (kg C2H4 eq.)       | 5.25E-04                     | 2.19E-04           | 1.47E-04                 | -2.02E-04                    |
| AP (kg SO2 eq.)          | 7.99E-03                     | 3.04E-03           | 1.50E-03                 | -5.80E-03                    |
| EP (kg PO4 eq.)          | 1.99E-03                     | 3.97E-04           | 1.17E-04                 | -1.29E-03                    |

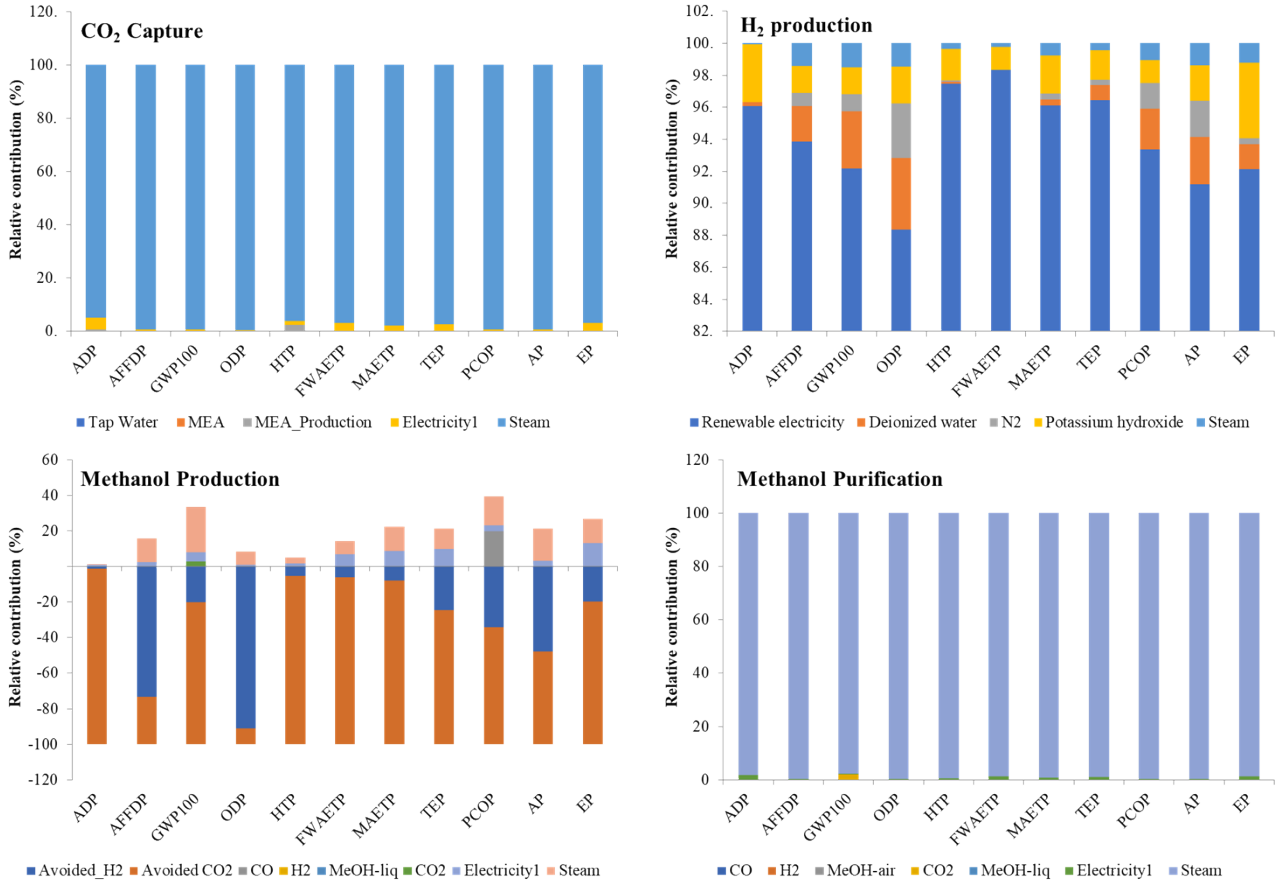

**Figure S10** Life cycle profile of a renewable methanol production through base case design. ADP = abiotic depletion potential; AFFDP = fossil fuel depletion potential; GWP100 = global warming potential 100 years; ODP = ozone depletion potential; HTP = human toxicity potential; FWAETP = freshwater aquatic ecotoxicity potential; MAETP = marine aquatic ecotoxicity potential; TEP = terrestrial ecotoxicity potential; PCOP = photo chemical oxidation potential; AP = acidification potential; EP = eutrophication potential.

**Table S9** Life cycle indicator results of methanol production via base case design.

| Impact categories                           | CO <sub>2</sub> Capture | H <sub>2</sub> Production | Methanol production | Methanol Purification |
|---------------------------------------------|-------------------------|---------------------------|---------------------|-----------------------|
| ADP (kg Sb eq.)                             | 5.12E-07                | 3.92E-06                  | -1.79E-05           | 8.99E-08              |
| AFFDP (MJ)                                  | 2.26E+01                | 6.32E+00                  | -3.14E+01           | 4.08E+00              |
| GWP100 (kg CO <sub>2</sub> eq.)             | 1.79E+00                | 4.71E-01                  | -1.02E+00           | 3.31E-01              |
| ODP (kg CFC-11 eq.)                         | 1.31E-07                | 3.63E-08                  | -3.64E-07           | 2.38E-08              |
| HTP (kg 1,4-DB eq.)                         | 3.72E-01                | 4.15E-01                  | -2.17E+00           | 6.53E-02              |
| FWAETP (kg 1,4-DB eq.)                      | 2.26E-01                | 4.04E-01                  | -5.53E-01           | 4.03E-02              |
| MAETP (kg 1,4-DB eq.)                       | 9.33E+02                | 4.80E+02                  | -1.14E+03           | 1.67E+02              |
| TEP (kg 1,4-DB eq.)                         | 1.20E-03                | 1.03E-03                  | -1.73E-03           | 2.14E-04              |
| PCOP (kg C <sub>2</sub> H <sub>4</sub> eq.) | 2.91E-04                | 1.12E-04                  | -2.37E-04           | 5.27E-05              |
| AP (kg SO <sub>2</sub> eq.)                 | 5.79E-03                | 1.69E-03                  | -5.49E-03           | 1.05E-03              |
| EP (kg PO <sub>4</sub> eq.)                 | 1.06E-03                | 3.43E-04                  | -1.20E-03           | 1.89E-04              |

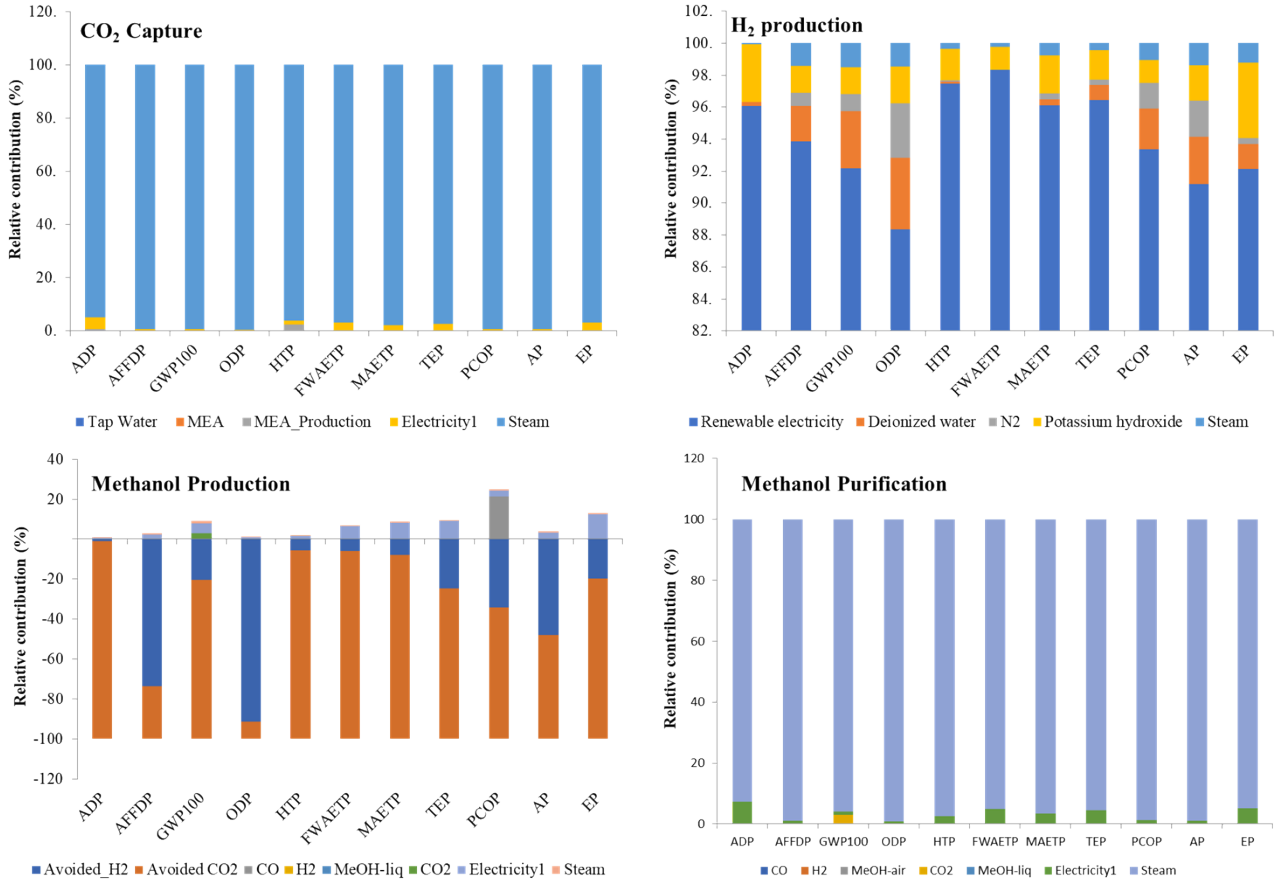

**Figure S11** Life cycle profile of a renewable methanol production through integrated design. ADP = abiotic depletion potential; AFFDP = fossil fuel depletion potential; GWP100 = global warming potential 100 years; ODP = ozone depletion potential; HTP = human toxicity potential; FWAETP = freshwater aquatic ecotoxicity potential; MAETP = marine aquatic ecotoxicity potential; TEP = terrestrial ecotoxicity potential; PCOP = photo chemical oxidation potential; AP = acidification potential; EP = eutrophication potential.

**Table S10** Life cycle indicator results of methanol production via integrated design.

| Impact categories                           | CO <sub>2</sub> Capture | H <sub>2</sub> Production | Methanol production | Methanol Purification |
|---------------------------------------------|-------------------------|---------------------------|---------------------|-----------------------|
| ADP (kg Sb eq.)                             | 5.12E-07                | 3.92E-06                  | -1.80E-05           | 6.60E-08              |
| AFFDP (MJ)                                  | 2.26E+01                | 6.32E+00                  | -3.62E+01           | 2.85E+00              |
| GWP100 (kg CO <sub>2</sub> eq.)             | 1.79E+00                | 4.71E-01                  | -1.40E+00           | 2.33E-01              |
| ODP (kg CFC-11 eq.)                         | 1.31E-07                | 3.63E-08                  | -3.92E-07           | 1.66E-08              |
| HTP (kg 1,4-DB eq.)                         | 3.72E-01                | 4.15E-01                  | -2.24E+00           | 4.62E-02              |
| FWAETP (kg 1,4-DB eq.)                      | 2.26E-01                | 4.04E-01                  | -6.02E-01           | 2.91E-02              |
| MAETP (kg 1,4-DB eq.)                       | 9.33E+02                | 4.80E+02                  | -1.34E+03           | 1.19E+02              |
| TEP (kg 1,4-DB eq.)                         | 1.20E-03                | 1.03E-03                  | -1.99E-03           | 1.53E-04              |
| PCOP (kg C <sub>2</sub> H <sub>4</sub> eq.) | 2.91E-04                | 1.12E-04                  | -2.93E-04           | 3.68E-05              |
| AP (kg SO <sub>2</sub> eq.)                 | 5.79E-03                | 1.69E-03                  | -6.72E-03           | 7.31E-04              |
| EP (kg PO <sub>4</sub> eq.)                 | 1.06E-03                | 3.43E-04                  | -1.42E-03           | 1.36E-04              |

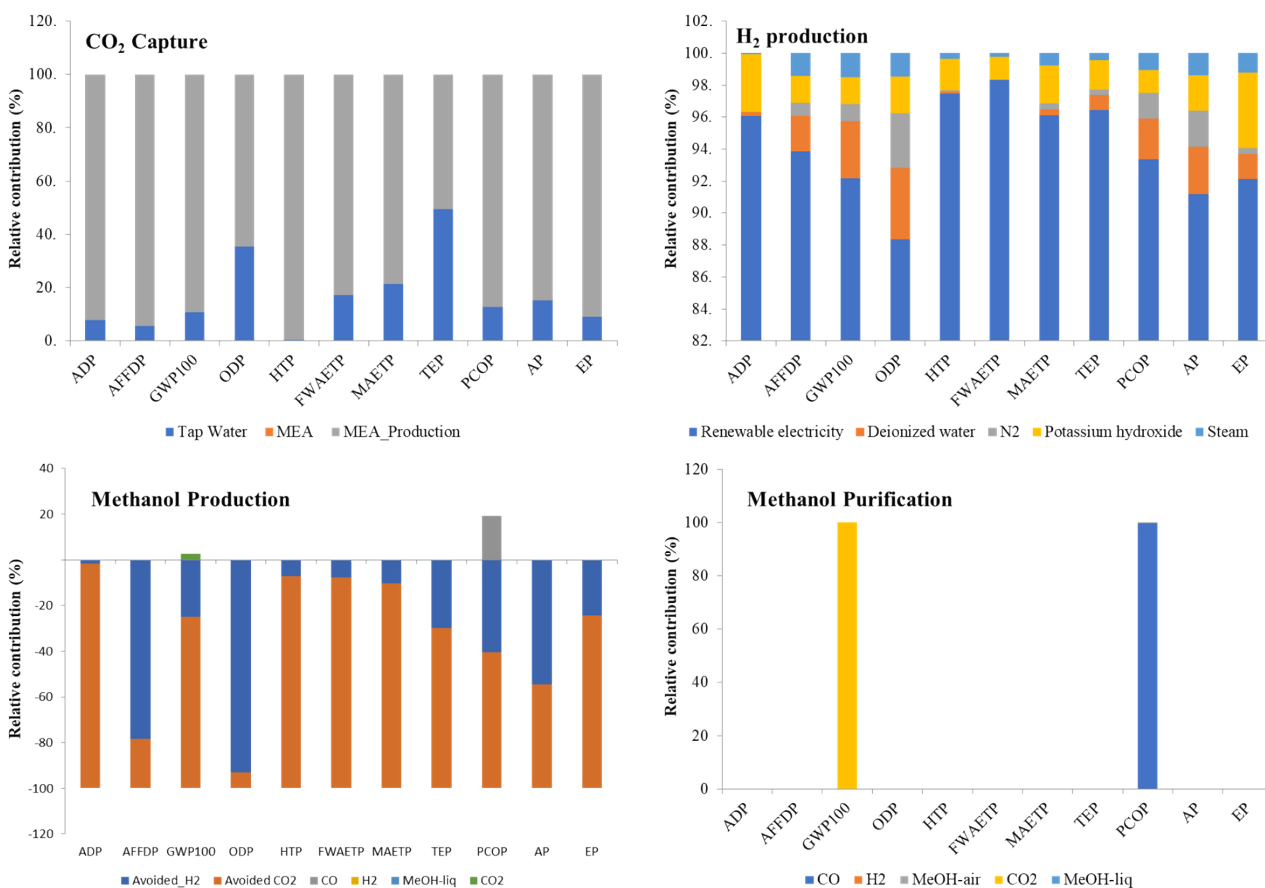

**Figure S12** Life cycle profile of a renewable methanol production through 100% renewable design. ADP = abiotic depletion potential; AFFDP = fossil fuel depletion potential; GWP100 = global warming potential 100 years; ODP = ozone depletion potential; HTP = human toxicity potential; FWAETP = freshwater aquatic ecotoxicity potential; MAETP = marine aquatic ecotoxicity potential; TEP = terrestrial ecotoxicity potential; PCOP = photo chemical oxidation potential; AP = acidification potential; EP = eutrophication potential.

**Table S11** Life cycle indicator results of methanol production via 100% renewable design.

| Impact categories                           | CO <sub>2</sub> Capture | H <sub>2</sub> Production | Methanol production | Methanol Purification |
|---------------------------------------------|-------------------------|---------------------------|---------------------|-----------------------|
| ADP (kg Sb eq.)                             | 3.69E-09                | 5.11E-06                  | -1.82E-05           | 0.00E+00              |
| AFFDP (MJ)                                  | 8.27E-03                | 8.24E+00                  | -4.57E+01           | 0.00E+00              |
| GWP100 (kg CO <sub>2</sub> eq.)             | 3.86E-04                | 6.14E-01                  | -1.59E+00           | 6.85E-03              |
| ODP (kg CFC-11 eq.)                         | 2.87E-11                | 4.73E-08                  | -5.07E-07           | 0.00E+00              |
| HTP (kg 1,4-DB eq.)                         | 8.60E-03                | 5.41E-01                  | -2.32E+00           | 0.00E+00              |
| FWAETP (kg 1,4-DB eq.)                      | 1.62E-04                | 5.27E-01                  | -6.57E-01           | 0.00E+00              |
| MAETP (kg 1,4-DB eq.)                       | 3.13E-01                | 6.25E+02                  | -1.50E+03           | 0.00E+00              |
| TEP (kg 1,4-DB eq.)                         | 7.27E-07                | 1.34E-03                  | -2.37E-03           | 0.00E+00              |
| PCOP (kg C <sub>2</sub> H <sub>4</sub> eq.) | 8.04E-08                | 1.46E-04                  | -3.48E-04           | 4.19E-08              |
| AP (kg SO <sub>2</sub> eq.)                 | 1.21E-06                | 2.21E-03                  | -8.01E-03           | 0.00E+00              |
| EP (kg PO <sub>4</sub> eq.)                 | 9.97E-07                | 4.47E-04                  | -1.73E-03           | 0.00E+00              |

## References

- [1] Devkota S, Pokhrel R, Rayamajhi B, Uprety B. Design and cost estimation of a CO<sub>2</sub> capture plant from cement flue gas for urea production in Nepal. *Int J Greenh Gas Control* 2021;111:103484. <https://doi.org/10.1016/j.ijggc.2021.103484>.
- [2] Dickson R, Brigljevic B, Lim H, Liu J. Maximizing the sustainability of a macroalgae biorefinery: A superstructure optimization of a volatile fatty acid platform. *Green Chem* 2020;22:4174–86. <https://doi.org/10.1039/d0gc00430h>.
- [3] Energy Information Administration n.d. <https://www.eia.gov/>.
- [4] Richard Turton, Richard C. Bailie, Wallace B. Whiting JAS. *Analysis, Synthesis and Design of Chemical Processes Third Edition*. 3rd ed. Prentice Hall; 2013. <https://doi.org/10.1017/CBO9781107415324.004>.
- [5] Bloomberg 2019. <https://www.bloomberg.com/news/articles/2019-11-13/global-oil-demand-to-hit-a-plateau-around-2030-iea-predicts> (accessed April 5, 2020).
- [6] Dickson R, Mancini E, Garg N, Woodley J, Gernaey K, Pinelo M, et al. Sustainable bio-succinic acid production: Superstructure optimization, techno-economic, and lifecycle assessment. *Energy Environ Sci* 2021. <https://doi.org/10.1039/D0EE03545A>.
